# Supplementary material for: Fluoranthene dyes for the detection of water content in methanol
Source: Royal Society of Chemistry journal article supplement (doi:10.1039/d1ra08392a), 2022-01-01
Supplement: d1ra08392a1.pdf [file d1ra08392a1.pdf]

# Electronic Supporting Information

## Fluoranthene dyes for the detection of water content in methanol

**Jie-Wei Rong<sup>b, §</sup>, Yu-Chen Liu<sup>a, §</sup>, Jia-Hui Zhou<sup>a</sup>, Guo-Dan Lu<sup>a</sup>, Hui-Yan Liu<sup>a, \*</sup> and Hai-Ying Wang<sup>a, \*</sup>**

<sup>a</sup> School of Chemistry & Materials Science, Jiangsu Normal University, Jiangsu Key Laboratory of Green Synthetic Chemistry for Functional Materials, Xuzhou 221116, P. R. China

<sup>b</sup> School of Chemistry and Materials Engineering, Huainan Normal University, Huainan, 232038, P. R. China

## NMR spectrum of all new compounds:

### $^1\text{H}$ NMR spectrum of compound 4a in $\text{CDCl}_3$ , 400 MHz

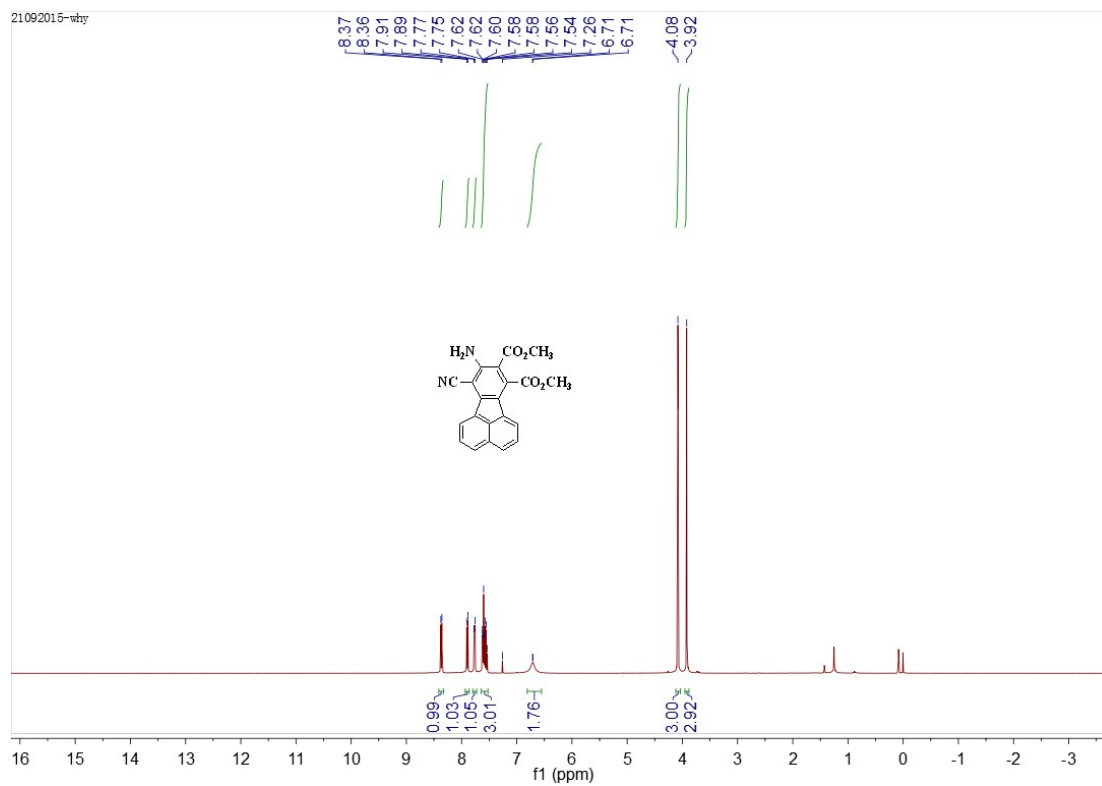

### $^{13}\text{C}$ NMR spectrum of compound 4a in $\text{CDCl}_3$ , 100 MHz

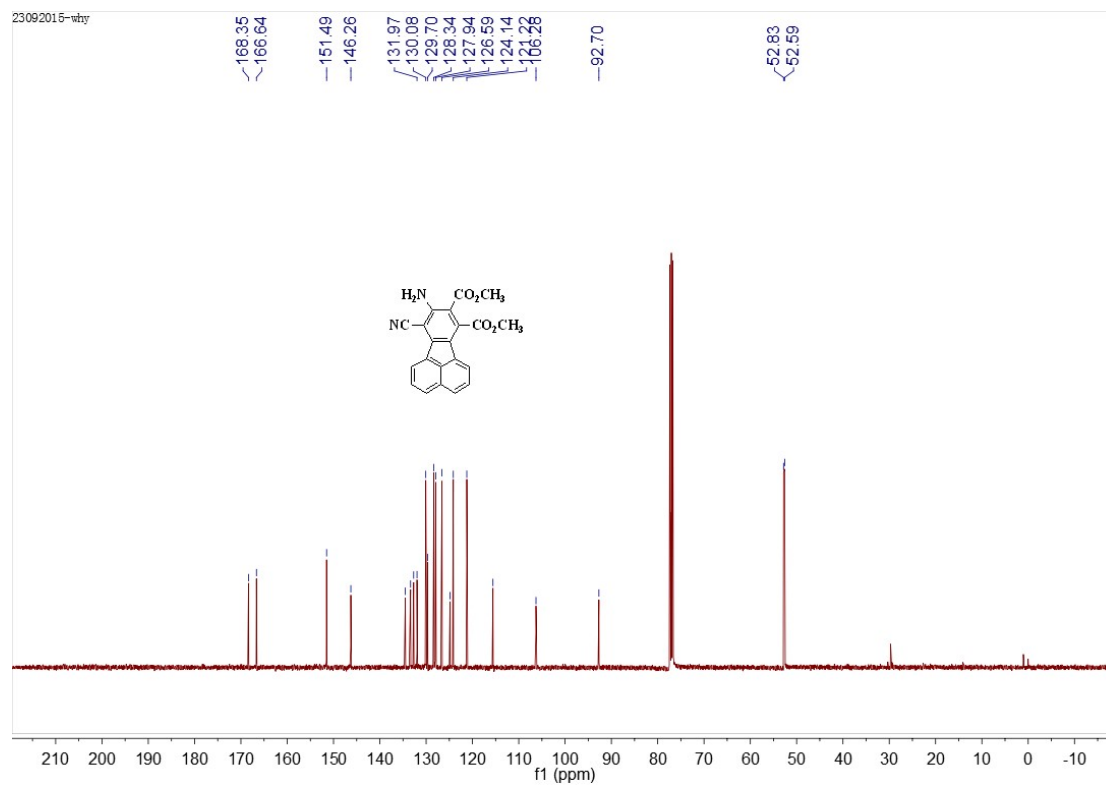

# $^1\text{H}$ NMR spectrum of compound 4b in $\text{CDCl}_3$ , 400 MHz

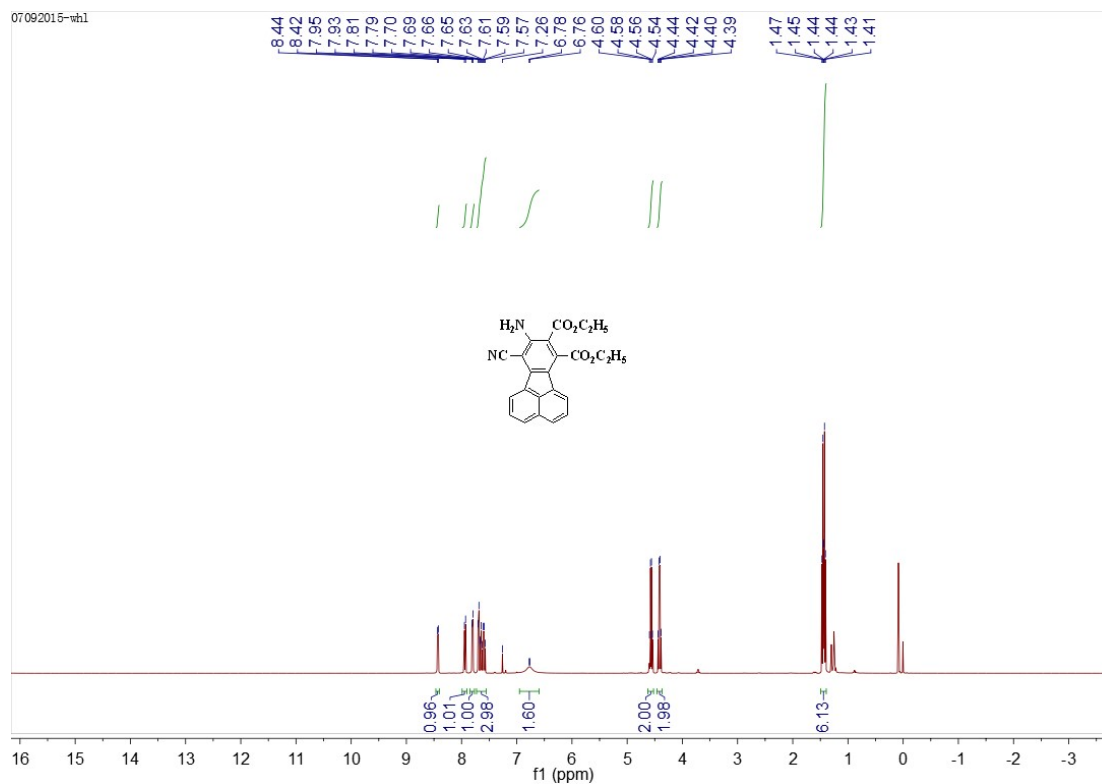

# $^{13}\text{C}$ NMR spectrum of compound 4b in $\text{CDCl}_3$ , 100 MHz

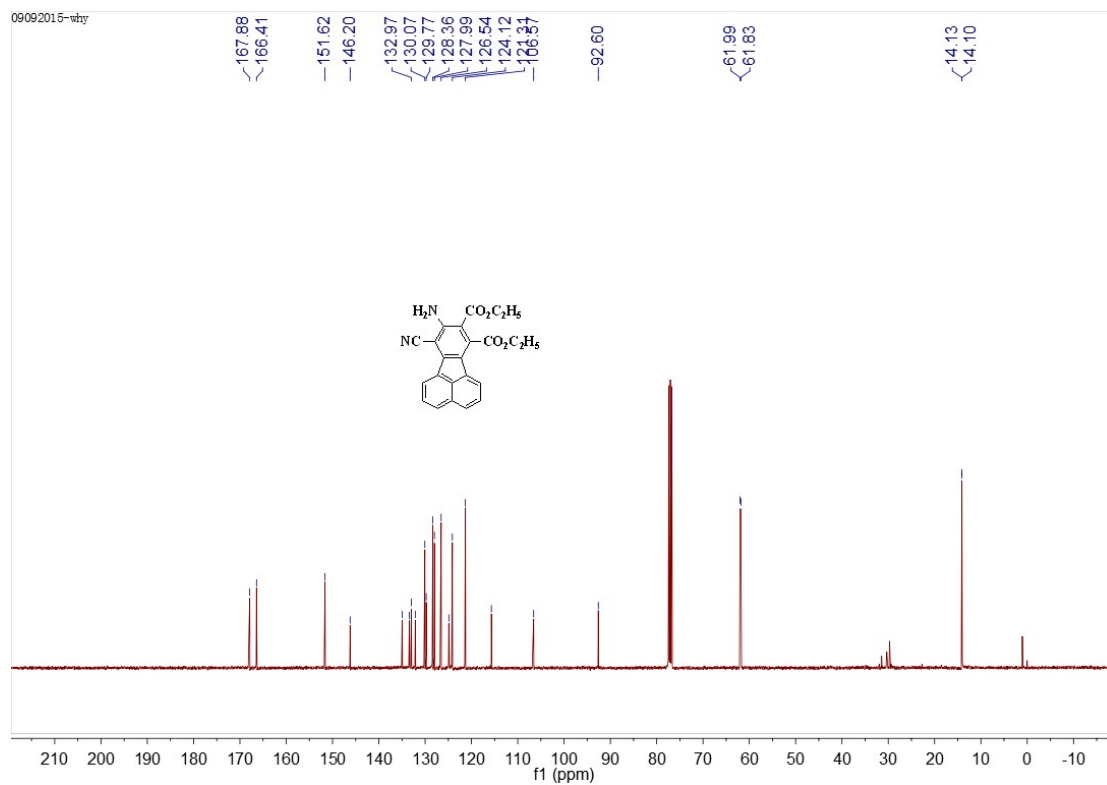

# <sup>1</sup>H NMR spectrum of compound 4c in DMSO, 400 MHz

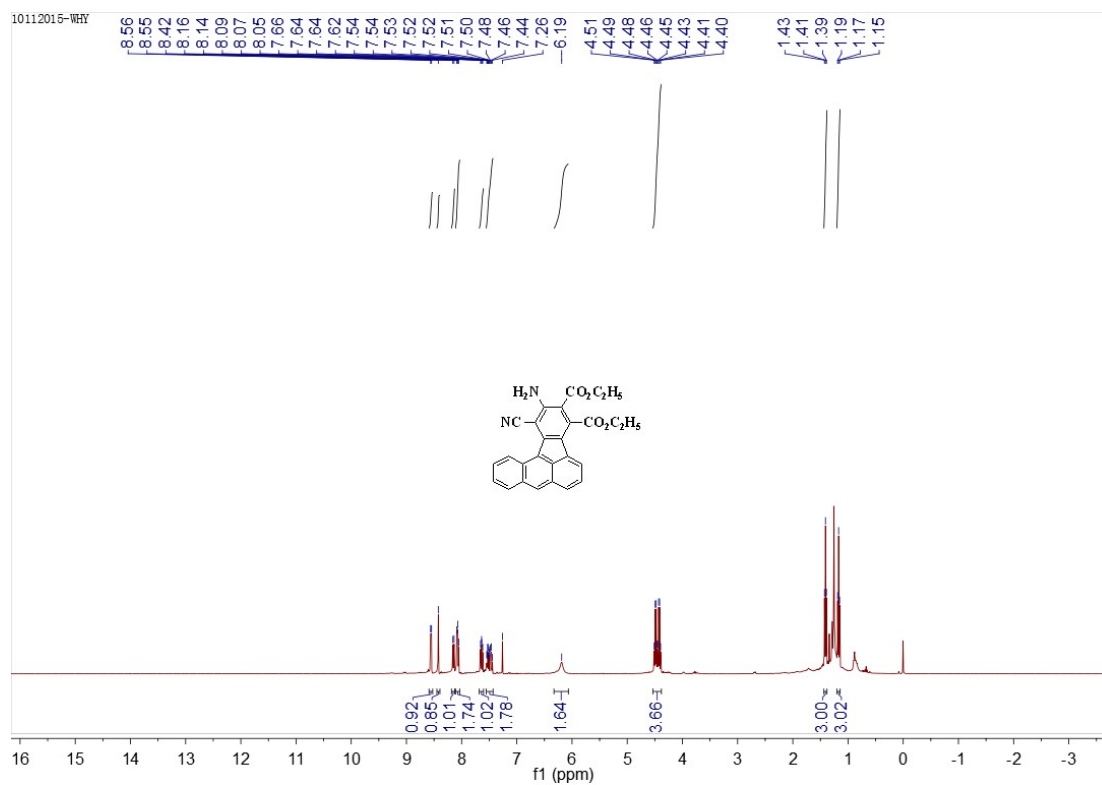

# <sup>13</sup>C NMR spectrum of compound 4c in DMSO, 100 MHz

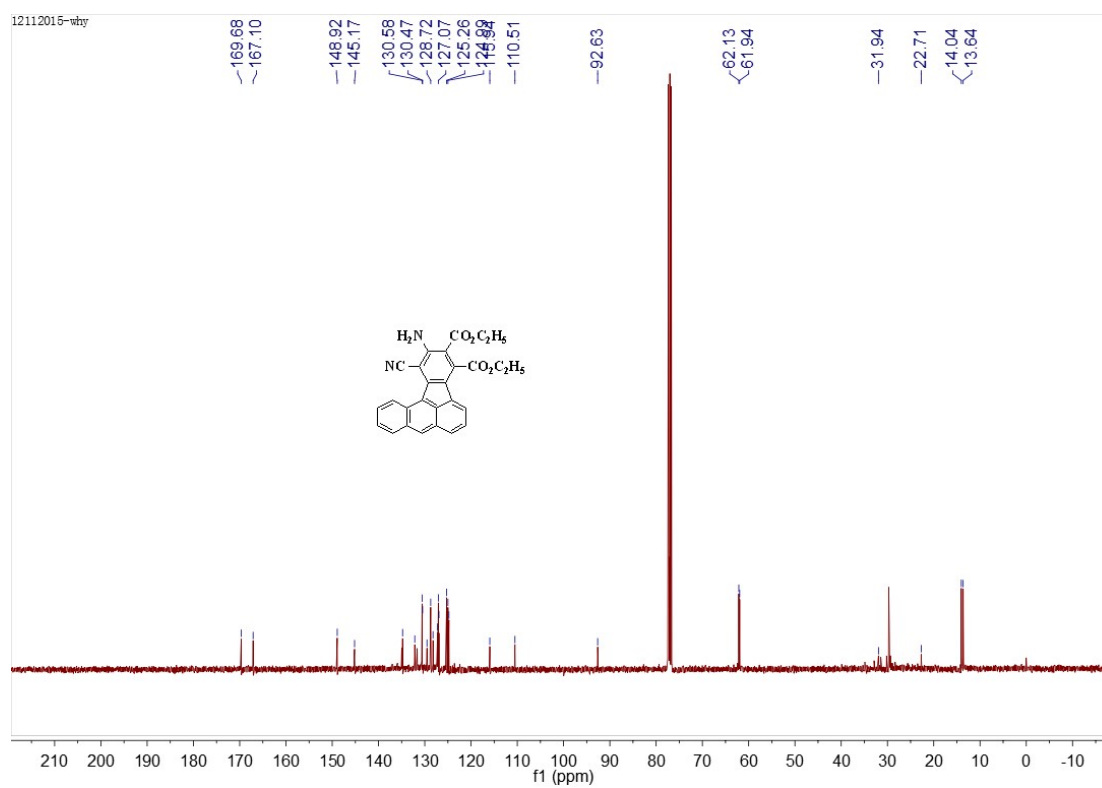

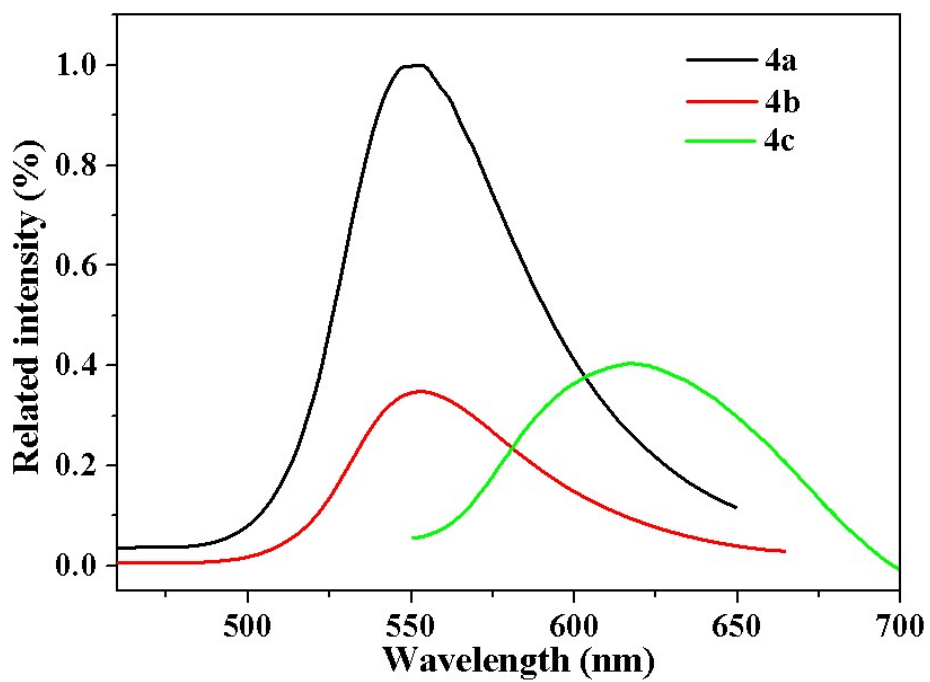

**Fig. S1** Emission spectra of 4a,4b and 4c in solid state ( $\lambda_{\text{ex}} = 336$  nm for 4a and 4b,  $\lambda_{\text{ex}} = 380$  nm for 4c).

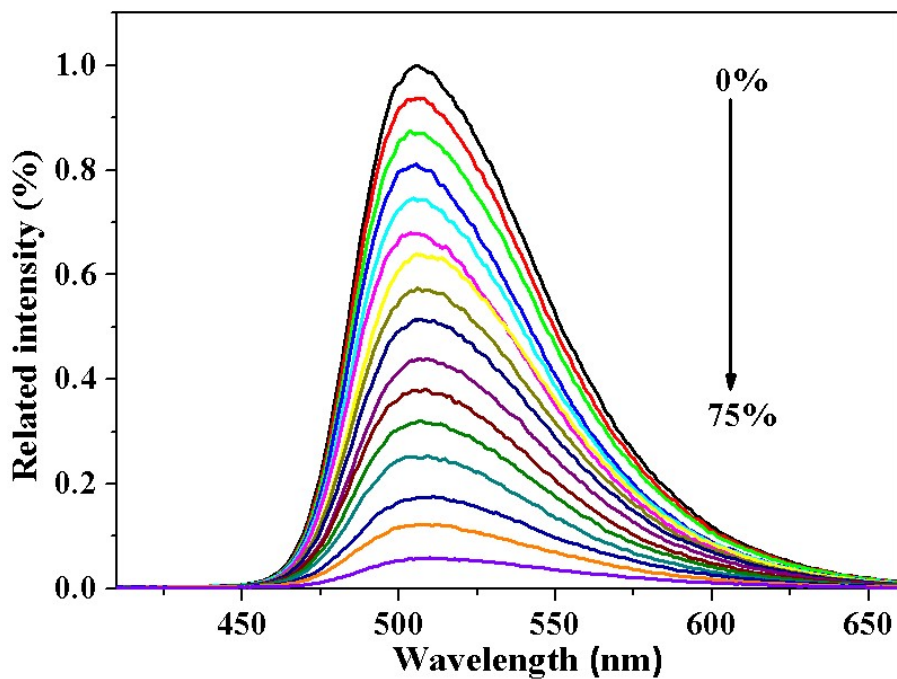

**Fig. S2** Fluorescence emission spectra of the **4b** probe contacted with different water contents in methanol in the range of 0 to 75% (v/v,  $\lambda_{\text{ex}} = 336$  nm).

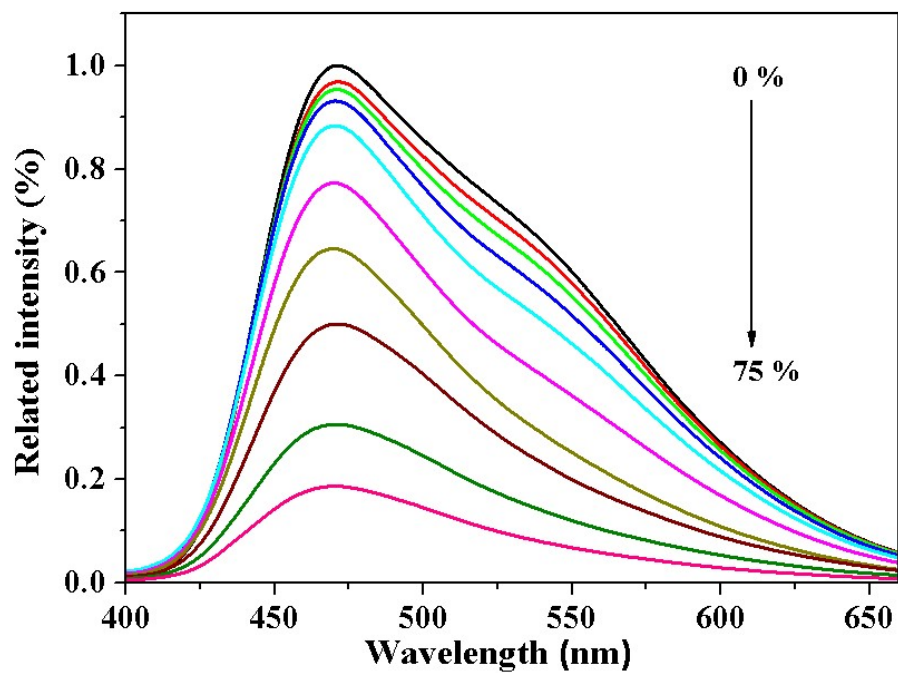

**Fig. S3** Fluorescence emission spectra of the **4c** probe contacted with different water contents in methanol in the range of 0 to 75% (v/v,  $\lambda_{ex} = 375$  nm).

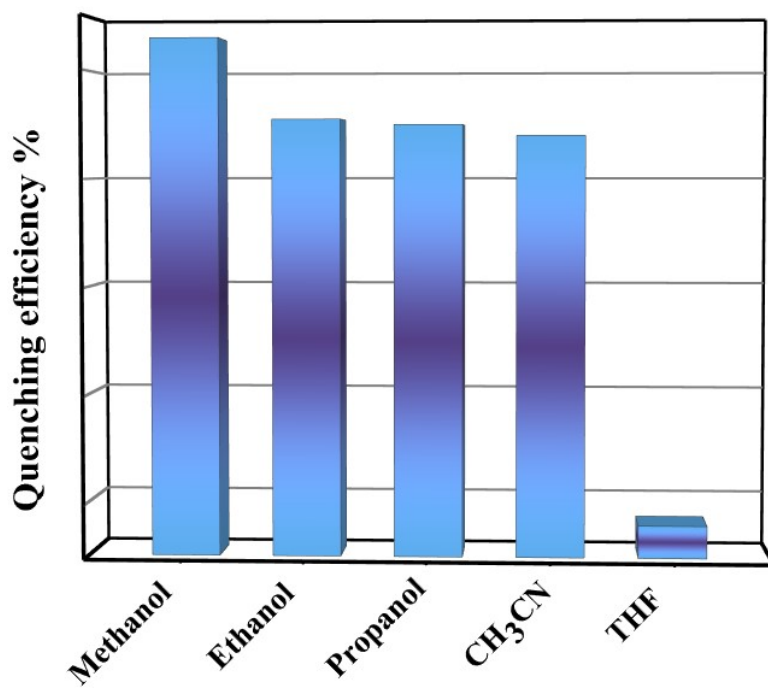

**Fig. S4** The fluorescence quenching efficiency of the **4a** in different solvents with 75% water contents (v/v,  $\lambda_{ex} = 336$  nm).

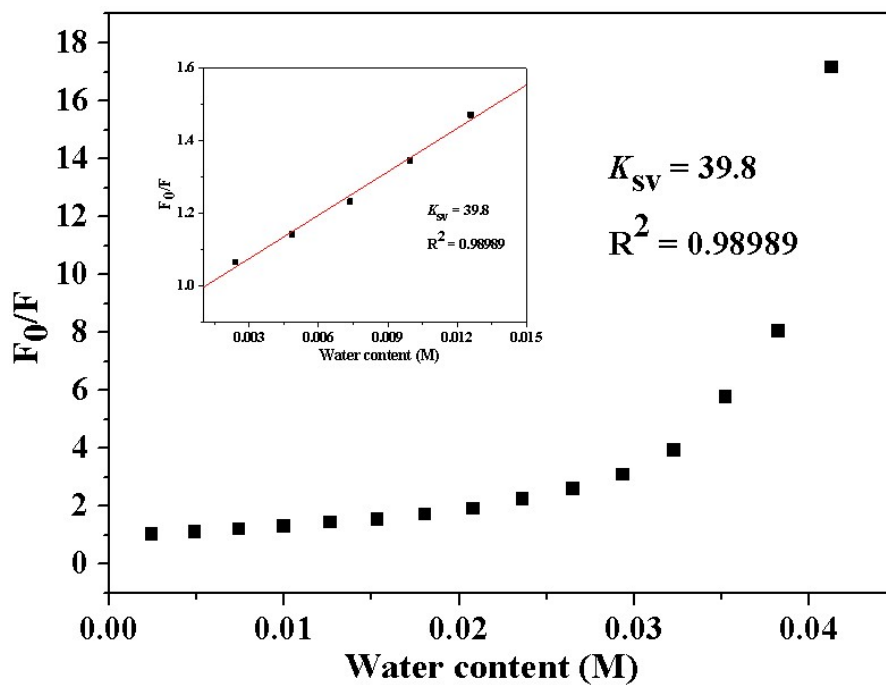

**Fig. S5** The Stern-Volmer plots for **4b** in methanol with a low-level of water. The solid lines represent fits to the concentration-resolved data using Stern-Volmer equation.

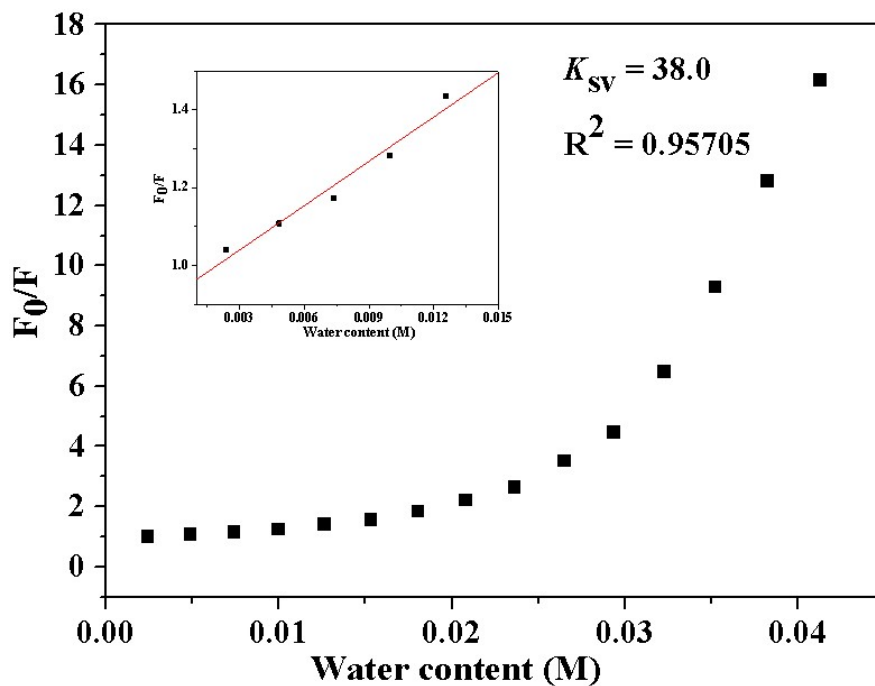

**Fig. S6** The Stern-Volmer plots for **4c** in methanol with a low-level of water. The solid lines represent fits to the concentration-resolved data using Stern-Volmer equation.

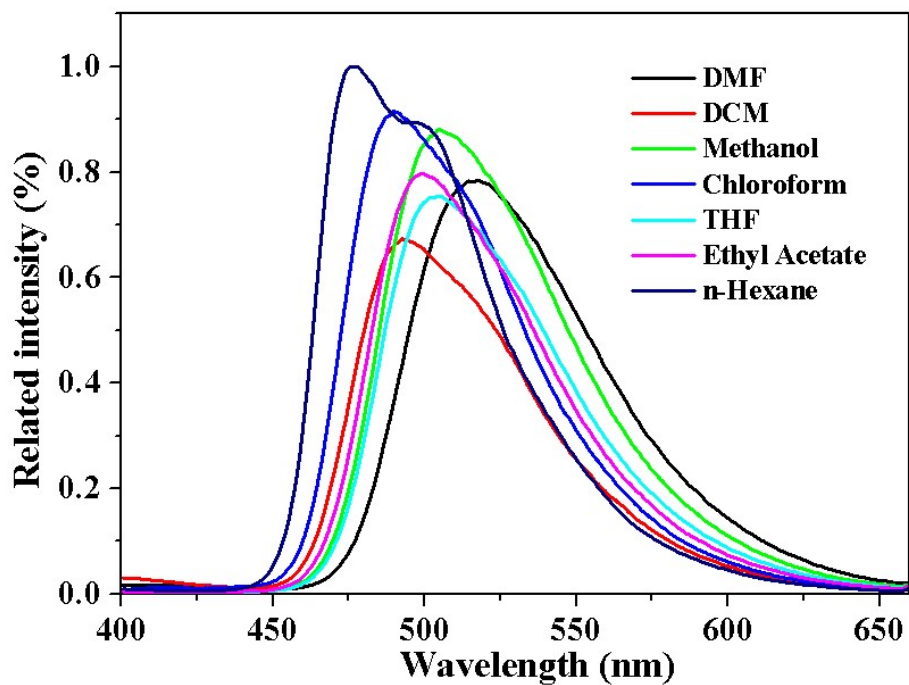

Fig. S7 The emission spectra of compound **4b** in different solvents ( $\lambda_{ex} = 336 \text{ nm}$ ,  $1 \times 10^{-5} \text{ mol} \cdot \text{L}^{-1}$ ).

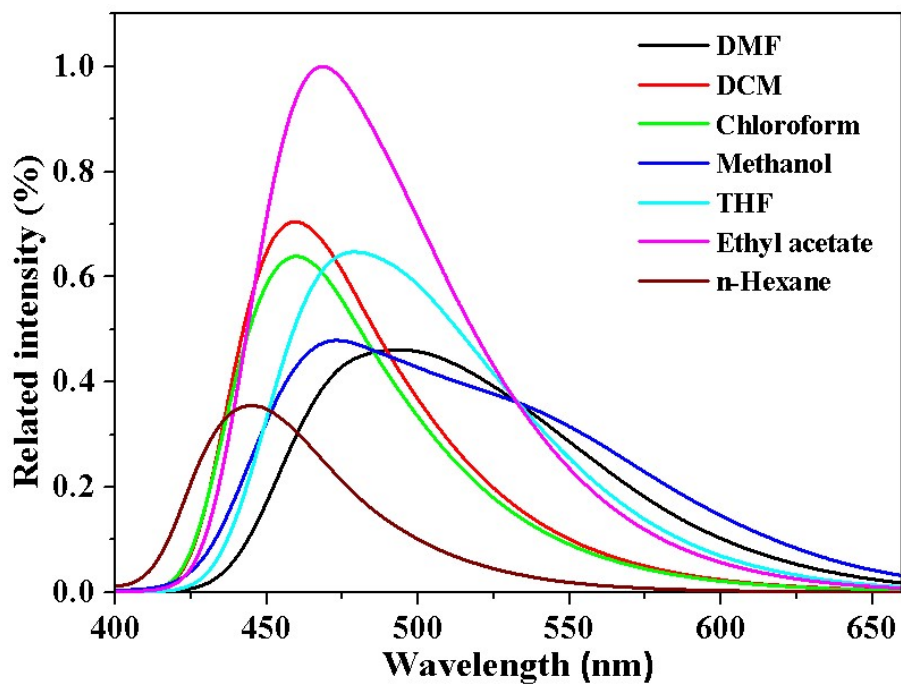

Fig. S8 The emission spectra of compound **4c** in different solvents ( $\lambda_{ex} = 375 \text{ nm}$ ,  $1 \times 10^{-5} \text{ mol} \cdot \text{L}^{-1}$ ).



**Table S1** Crystallographic data and structure refinement parameters for **4a**.

| MOFs                                                           | <b>4a</b>                                                     |
|----------------------------------------------------------------|---------------------------------------------------------------|
| empirical formula                                              | C <sub>22</sub> H <sub>14</sub> N <sub>2</sub> O <sub>5</sub> |
| formula wt                                                     | 386.35                                                        |
| cryst syst                                                     | Triclinic                                                     |
| space group                                                    | P-1                                                           |
| a (Å)                                                          | 9.0077(3)                                                     |
| b (Å)                                                          | 9.8072(4)                                                     |
| c (Å)                                                          | 11.1700(4)                                                    |
| α(deg)                                                         | 85.052(2)                                                     |
| β(deg)                                                         | 68.8505(19)                                                   |
| γ(deg)                                                         | 81.886(2)                                                     |
| V (Å <sup>3</sup> )                                            | 910.41(6)                                                     |
| Z                                                              | 2                                                             |
| ρ <sub>calcd</sub> (g cm <sup>-3</sup> )                       | 1.409                                                         |
| μ (mm <sup>-1</sup> )                                          | 0.102                                                         |
| F(000)                                                         | 400                                                           |
| index ranges                                                   | -12 ≤ h ≤ 12<br>-13 ≤ k ≤ 13<br>-14 ≤ l ≤ 14                  |
| R <sub>int</sub>                                               | 0.0281                                                        |
| data/restraints/parameters                                     | 4594/0/274                                                    |
| Goodness of fit                                                | 1.032                                                         |
| R <sub>1</sub> a, wR <sub>2</sub> b (I > 2σ(I))                | 0.0512, 0.1534                                                |
| R <sub>1</sub> , wR <sub>2</sub> (all data)                    | 0.0846, 0.1897                                                |
| (Δρ) <sub>max</sub> , (Δρ) <sub>min</sub> (e Å <sup>-3</sup> ) | 0.670, -0.447                                                 |

$$^a R_1 = \frac{\sum ||F_o| - |F_c||}{\sum |F_o|}; \quad ^b wR_2 = \left[ \frac{\sum w(F_o^2 - F_c^2)^2}{\sum w(F_o^2)^2} \right]^{1/2}$$
